# Supplementary material
Source: Springer Nature journal article supplement (https://www.springermedizin.de/resource/supplementary/13051_2011_221_MOESM3_ESM.pdf/9670194)
Supplement: MOESM3 [file 9670194]

38,460 pts with SCCHN  
during April 2003-March 2009

23,696 pts excluded;  
No surgical resection

14,764 pts with resection

739 pts excluded;  
Resection before July 2003

14,025 pts within  
identification period

2,599 pts excluded;  
Less than 1 year follow-up

11,426 pts with  
at least 1 year follow-up

23 pts excluded;  
Age < 18

**Selected subjects:  
11,403 pts**
